# Supplementary material for: TDP-43 pathology in Drosophila induces glial-cell type specific toxicity that can be ameliorated by knock-down of SF2/SRSF1
Source: PubMed Central journal article supplement (PMC10553832; doi:10.1371/journal.pgen.1010973), 2023-09-25

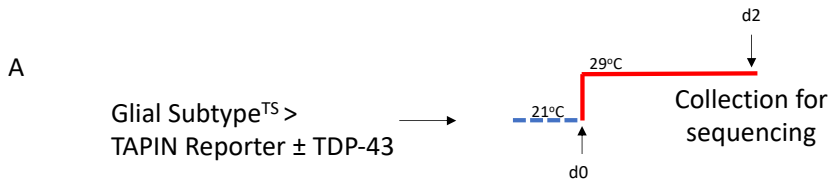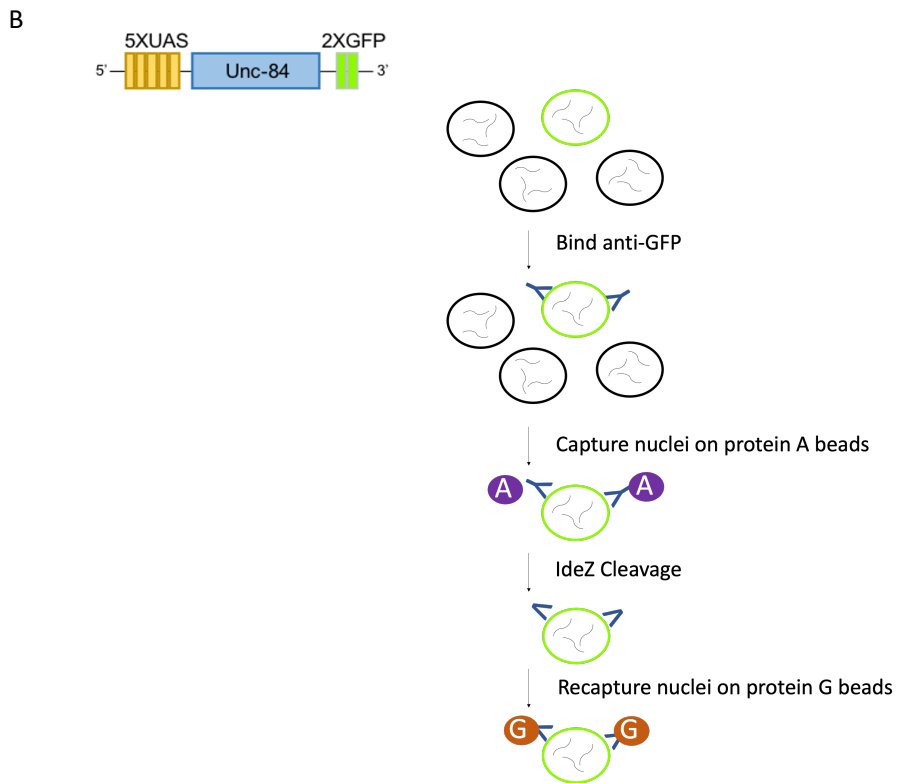

Supplement: pgen.1010973.s001.pdf [file pgen.1010973.s001.pdf]
