# Supplementary material for: TDP-43 pathology in Drosophila induces glial-cell type specific toxicity that can be ameliorated by knock-down of SF2/SRSF1
Source: PubMed Central journal article supplement (PMC10553832; doi:10.1371/journal.pgen.1010973), 2023-09-25
Supplement: pgen.1010973.s004.pdf [file pgen.1010973.s004.pdf]

| <b>Glial Subtype</b> | <b>Cells/ Brain<sup>1</sup></b> | <b>Cells/ Group (n=6)</b> | <b>Flies/ Group (n=6)</b> |
|----------------------|---------------------------------|---------------------------|---------------------------|
| PNG                  | 2246                            | >1,000,000                | >445                      |
| SPG                  | 300                             | >300,000                  | >1,000                    |
| CG                   | 2635                            | >1,000,000                | >380                      |
| ALG                  | 4618                            | >1,000,000                | >217                      |
| EG                   | 3722                            | >1,000,000                | >267                      |

**S1 Table. Numbers of fly heads used for TAPIN purification and sequencing based on number of glial cells of each type per brain.<sup>1</sup>Kremer et al., 2017**
