# Supplementary material for: TDP-43 pathology in Drosophila induces glial-cell type specific toxicity that can be ameliorated by knock-down of SF2/SRSF1
Source: PubMed Central journal article supplement (PMC10553832; doi:10.1371/journal.pgen.1010973), 2023-09-25
Supplement: pgen.1010973.s011.pdf [file pgen.1010973.s011.pdf]

| Metric           | PNG <sup>ls</sup> Control (n=3) |     | PNG <sup>ls</sup> + TDP-43 (n=3) |      | SPG <sup>ls</sup> Control (n=3) |     | SPG <sup>ls</sup> + TDP-43 (n=3) |     | CG <sup>ls</sup> Control (n=2) |     | CG <sup>ls</sup> + TDP-43 (n=3) |  | ALG <sup>ls</sup> Control (n=2) |  | ALG <sup>ls</sup> + TDP-43 (n=3) |  | EG <sup>ls</sup> Control (n=3) |  | EG <sup>ls</sup> + TDP-43 (n=3) |  |
|------------------|---------------------------------|-----|----------------------------------|------|---------------------------------|-----|----------------------------------|-----|--------------------------------|-----|---------------------------------|--|---------------------------------|--|----------------------------------|--|--------------------------------|--|---------------------------------|--|
|                  | SF2 expression (MRN)            | 899 | 363                              | 1090 | 594                             | 780 | 727                              | 591 | 453                            | 780 | 669                             |  |                                 |  |                                  |  |                                |  |                                 |  |
| Log2 fold change | -1.31                           |     | -0.85                            |      | n/a                             |     | n/a                              |     | n/a                            |     | n/a                             |  | n/a                             |  | n/a                              |  | n/a                            |  | n/a                             |  |
| p                | <0.0001                         |     | <0.001                           |      | n/a                             |     | n/a                              |     | n/a                            |     | n/a                             |  | n/a                             |  | n/a                              |  | n/a                            |  | n/a                             |  |

**S8 Table. SF2 expression across glial cell types.** SF2 expression was significantly reduced at day 2 post induction of TDP-43 in SPG and PNG day 2.
